# Supplementary material for: A novel symmetric pyrazine (pyz)-bridged uranyl dimer [UO2Cl3(H2O)(Pyz)0.5]22−: synthesis, structure and computational analysis
Source: Royal Society of Chemistry journal article supplement (doi:10.1039/d2dt01486f), 2022-01-01
Supplement: d2dt01486f4.pdf [file d2dt01486f4.pdf]

Electronic Supporting Information (ESI)

for

**A novel symmetric pyrazine (pyz)-bridged uranyl dimer**

**[UO<sub>2</sub>Cl<sub>3</sub>(H<sub>2</sub>O)(Pyz)<sub>0.5</sub>]<sub>2</sub><sup>2-</sup>: Synthesis, structural and computational analysis**

Nicole M. Byrne,<sup>a</sup> Mark H. Schofield,<sup>a</sup> and Christopher L. Cahill<sup>a\*</sup>

<sup>a</sup>Department of Chemistry, The George Washington University, 800 22<sup>nd</sup> St. NW, Suite 4000, Washington, D.C., 20052

**Table of Contents**

|                   |                                                                                                                                                              |    |
|-------------------|--------------------------------------------------------------------------------------------------------------------------------------------------------------|----|
| <b>Chart S1</b>   | CSD search parameters for actinide/actinyl bridged compounds.....                                                                                            | 02 |
| <b>Table S1</b>   | Crystallography table for compound <b>1</b> .....                                                                                                            | 03 |
| <b>Table S2</b>   | Bond distances and angles for compound <b>1</b> .....                                                                                                        | 04 |
| <b>Figure S1</b>  | ORTEP drawing of compound <b>1</b> .....                                                                                                                     | 05 |
| <b>Figure S2</b>  | Room temperature UV-Vis-DRS spectrum of compound <b>1</b> .....                                                                                              | 06 |
| <b>Figure S3</b>  | Room temperature Raman spectrum of <b>1</b> .....                                                                                                            | 07 |
| <b>Figure S4</b>  | Labeled computational model of [UO <sub>2</sub> Cl <sub>3</sub> (H <sub>2</sub> O)(Pyz) <sub>0.5</sub> ] <sub>2</sub> <sup>2-</sup> .....                    | 08 |
| <b>Figure S5</b>  | Optimized versus unoptimized geometry of [UO <sub>2</sub> Cl <sub>3</sub> (H <sub>2</sub> O)(Pyz) <sub>0.5</sub> ] <sub>2</sub> <sup>2-</sup> .....          | 09 |
| <b>Figure S6</b>  | Labeled computational model of [UO <sub>2</sub> Cl <sub>4</sub> ] <sub>2</sub> <sup>2-</sup> .....                                                           | 10 |
| <b>Figure S7</b>  | Isodensity representation of the HOMO and LUMO for [UO <sub>2</sub> Cl <sub>4</sub> ] <sub>2</sub> <sup>2-</sup> .....                                       | 11 |
| <b>Table S3</b>   | Calculated Raman induced atomic displacements for [UO <sub>2</sub> Cl <sub>3</sub> (H <sub>2</sub> O)(Pyz) <sub>0.5</sub> ] <sub>2</sub> <sup>2-</sup> ..... | 12 |
| <b>Figure S8</b>  | Calculated Raman spectrum of [UO <sub>2</sub> Cl <sub>3</sub> (H <sub>2</sub> O)(Pyz) <sub>0.5</sub> ] <sub>2</sub> <sup>2-</sup> .....                      | 13 |
| <b>Table S4</b>   | Calculated Raman induced atomic displacements for [UO <sub>2</sub> Cl <sub>4</sub> ] <sub>2</sub> <sup>2-</sup> .....                                        | 14 |
| <b>Table S5</b>   | Method validation of the [UO <sub>2</sub> Cl <sub>3</sub> (H <sub>2</sub> O)(Pyz) <sub>0.5</sub> ] <sub>2</sub> <sup>2-</sup> computational model.....       | 15 |
| <b>Table S6</b>   | Method validation of the [UO <sub>2</sub> Cl <sub>4</sub> ] <sub>2</sub> <sup>2-</sup> computational model.....                                              | 16 |
| <b>References</b> | .....                                                                                                                                                        | 17 |

**Chart S1:** Input structural search parameters and CSD results used to interrogate possible other pyrazine bridged complexes and bridged dimers of interest.

| <u>Structural Search Parameters</u>                                                 | <u>CSD Results (CSD Code)<sup>1</sup></u>                                                                                                                                                                                                                                                                                                                                                          |
|-------------------------------------------------------------------------------------|----------------------------------------------------------------------------------------------------------------------------------------------------------------------------------------------------------------------------------------------------------------------------------------------------------------------------------------------------------------------------------------------------|
| 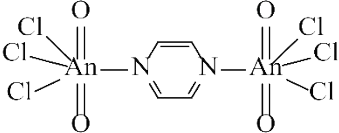   | N/A                                                                                                                                                                                                                                                                                                                                                                                                |
|    | PUQJOB <sup>2</sup>                                                                                                                                                                                                                                                                                                                                                                                |
|    | BZAPXU10 <sup>3</sup><br>HOYXAU <sup>4</sup><br>HOYXAU01 <sup>4</sup>                                                                                                                                                                                                                                                                                                                              |
|    | BZAPXU10 <sup>3</sup>                                                                                                                                                                                                                                                                                                                                                                              |
|   | EYEREF <sup>5</sup><br>EYERIJ <sup>5</sup><br>IBADAT <sup>6</sup><br>PUQJOB <sup>2</sup><br>QORGIO <sup>7</sup><br>UYANUE <sup>8</sup>                                                                                                                                                                                                                                                             |
|  | EYEREF <sup>5</sup><br>EYERIJ <sup>5</sup><br>IBADAT <sup>6</sup><br>JOJMEB <sup>9</sup><br>PUQJOB <sup>2</sup><br>QORGIO <sup>7</sup><br>SODCOE <sup>10</sup><br>SODCUK <sup>10</sup><br>UYANUE <sup>8</sup>                                                                                                                                                                                      |
|  | N/A                                                                                                                                                                                                                                                                                                                                                                                                |
|  | NATJUR <sup>11</sup><br>BEZLEX <sup>12</sup><br>CAWGAJ <sup>13</sup><br>CURCRO <sup>14</sup><br>DAPWUM <sup>15</sup><br>DUFTUW <sup>16</sup><br>NILBAL <sup>17</sup><br>NILBAL01 <sup>18</sup><br>SIRJIO <sup>19</sup><br>TEAUFO10 <sup>20</sup><br>XEVRAS <sup>21</sup><br>XEVRAS01 <sup>22</sup><br>XIHSAL <sup>22</sup><br>XIHSEP <sup>22</sup><br>XIHSIT <sup>22</sup><br>ZAHSOT <sup>23</sup> |

**Table S1:** Crystallography table for compound **1**.

|                                                       | <b>1</b>                                                       |
|-------------------------------------------------------|----------------------------------------------------------------|
| <b>Chemical Formula</b>                               | $(C_4H_5N_2)_2[UO_2Cl_3(H_2O)(C_4H_4N_2)_{0.5}]_2 \cdot 2H_2O$ |
| <b>Formula Weight (g/mol)</b>                         | 1067.1                                                         |
| <b>Crystal System</b>                                 | Triclinic                                                      |
| <b>Space Group</b>                                    | P-1                                                            |
| <b><i>a</i> (Å)</b>                                   | 7.3929(3)                                                      |
| <b><i>b</i> (Å)</b>                                   | 8.7830(5)                                                      |
| <b><i>c</i> (Å)</b>                                   | 12.2365(6)                                                     |
| <b><math>\alpha</math> (°)</b>                        | 70.837(2)                                                      |
| <b><math>\beta</math> (°)</b>                         | 73.478(2)                                                      |
| <b><math>\gamma</math> (°)</b>                        | 69.922(3)                                                      |
| <b><i>V</i> (Å<sup>3</sup>)</b>                       | 691.57(9)                                                      |
| <b><i>Z</i></b>                                       | 1                                                              |
| <b><i>T</i> (K)</b>                                   | 100(2)                                                         |
| <b><math>\lambda</math> (Mo K<math>\alpha</math>)</b> | 0.71073                                                        |
| <b><math>\mu</math> (mm<sup>-1</sup>)</b>             | 12.319                                                         |
| <b><i>R</i><sub>int</sub></b>                         | 0.0262                                                         |
| <b><i>R</i><sub>1</sub></b>                           | 0.0106                                                         |
| <b>w<i>R</i><sub>2</sub></b>                          | 0.0256                                                         |

**Table S2:** Bond distances and angles for compound **1**, (HPyz<sup>+</sup>)<sub>2</sub>[UO<sub>2</sub>Cl<sub>3</sub>(H<sub>2</sub>O)(Pyz)<sub>0.5</sub>]<sub>2</sub>·2H<sub>2</sub>O.

| <u>Atom(1)-Atom(2)</u> | <u>Bond distance (Å)</u> | <u>Atom(1)-Atom(2)-Atom(3)</u> | <u>Bond angle (°)</u> | <u>Atom(1)-Atom(2)-Atom(3)</u> | <u>Bond Angle (°)</u> |
|------------------------|--------------------------|--------------------------------|-----------------------|--------------------------------|-----------------------|
| U(1)-O(2)              | 1.7640(15)               | O(2)-U(1)-O(1)                 | 175.82(7)             | C(5)-C(6)-H(6)                 | 118.9                 |
| U(1)-O(1)              | 1.7654(14)               | O(2)-U(1)-O(5)                 | 90.05(7)              | N(4)-C(7)-C(8)                 | 122.1(2)              |
| U(1)-O(5)              | 2.4385(15)               | O(1)-U(1)-O(5)                 | 91.84(6)              | N(4)-C(7)-H(7)                 | 118.9                 |
| U(1)-N(1)              | 2.5979(19)               | O(2)-U(1)-N(1)                 | 85.91(7)              | C(8)-C(7)-H(7)                 | 118.9                 |
| U(1)-Cl(2)             | 2.6895(6)                | O(1)-U(1)-N(1)                 | 90.24(6)              | N(3)-C(8)-C(7)                 | 118.3(2)              |
| U(1)-Cl(3)             | 2.7121(5)                | O(5)-U(1)-N(1)                 | 139.95(6)             | N(3)-C(8)-H(8)                 | 120.9                 |
| U(1)-Cl(1)             | 2.7543(5)                | O(2)-U(1)-Cl(2)                | 91.55(6)              | C(7)-C(8)-H(8)                 | 120.9                 |
| O(5)-H(5A)             | 0.8699                   | O(1)-U(1)-Cl(2)                | 92.59(5)              | H(7B)-O(7)-H(7A)               | 110(3)                |
| O(5)-H(5B)             | 0.8699                   | O(5)-U(1)-Cl(2)                | 71.79(4)              |                                |                       |
| N(1)-C(2)              | 1.340(3)                 | N(1)-U(1)-Cl(2)                | 148.04(4)             |                                |                       |
| N(1)-C(1)              | 1.342(3)                 | O(2)-U(1)-Cl(3)                | 90.72(5)              |                                |                       |
| C(1)-C(2)#1            | 1.377(3)                 | O(1)-U(1)-Cl(3)                | 89.50(5)              |                                |                       |
| C(1)-H(1)              | 0.95                     | O(5)-U(1)-Cl(3)                | 150.01(4)             |                                |                       |
| C(2)-H(2)              | 0.95                     | N(1)-U(1)-Cl(3)                | 69.97(4)              |                                |                       |
| N(3)-C(8)              | 1.328(3)                 | Cl(2)-U(1)-Cl(3)               | 78.219(16)            |                                |                       |
| N(3)-C(5)              | 1.336(3)                 | O(2)-U(1)-Cl(1)                | 90.83(5)              |                                |                       |
| N(3)-H(3)              | 0.8801                   | O(1)-U(1)-Cl(1)                | 86.31(5)              |                                |                       |
| N(4)-C(7)              | 1.329(3)                 | O(5)-U(1)-Cl(1)                | 70.30(4)              |                                |                       |
| N(4)-C(6)              | 1.337(3)                 | N(1)-U(1)-Cl(1)                | 69.94(4)              |                                |                       |
| C(5)-C(6)              | 1.373(3)                 | Cl(2)-U(1)-Cl(1)               | 142.010(17)           |                                |                       |
| C(5)-H(5)              | 0.95                     | Cl(3)-U(1)-Cl(1)               | 139.657(17)           |                                |                       |
| C(6)-H(6)              | 0.95                     | U(1)-O(5)-H(5A)                | 127.1                 |                                |                       |
| C(7)-C(8)              | 1.378(3)                 | U(1)-O(5)-H(5B)                | 127.9                 |                                |                       |
| C(7)-H(7)              | 0.95                     | H(5A)-O(5)-H(5B)               | 104.5                 |                                |                       |
| C(8)-H(8)              | 0.95                     | C(2)-N(1)-C(1)                 | 116.4(2)              |                                |                       |
| O(7)-H(7B)             | 0.804(17)                | C(2)-N(1)-U(1)                 | 120.79(14)            |                                |                       |
| O(7)-H(7A)             | 0.791(17)                | C(1)-N(1)-U(1)                 | 122.68(15)            |                                |                       |
|                        |                          | N(1)-C(1)-C(2)#1               | 121.7(2)              |                                |                       |
|                        |                          | N(1)-C(1)-H(1)                 | 119.1                 |                                |                       |
|                        |                          | C(2)#1-C(1)-H(1)               | 119.1                 |                                |                       |
|                        |                          | N(1)-C(2)-C(1)#1               | 121.9(2)              |                                |                       |
|                        |                          | N(1)-C(2)-H(2)                 | 119.1                 |                                |                       |
|                        |                          | C(1)#1-C(2)-H(2)               | 119.1                 |                                |                       |
|                        |                          | C(8)-N(3)-C(5)                 | 121.7(2)              |                                |                       |
|                        |                          | C(8)-N(3)-H(3)                 | 119.1                 |                                |                       |
|                        |                          | C(5)-N(3)-H(3)                 | 119.2                 |                                |                       |
|                        |                          | C(7)-N(4)-C(6)                 | 117.7(2)              |                                |                       |
|                        |                          | N(3)-C(5)-C(6)                 | 118.1(2)              |                                |                       |
|                        |                          | N(3)-C(5)-H(5)                 | 120.9                 |                                |                       |
|                        |                          | C(6)-C(5)-H(5)                 | 120.9                 |                                |                       |
|                        |                          | N(4)-C(6)-C(5)                 | 122.1(2)              |                                |                       |
|                        |                          | N(4)-C(6)-H(6)                 | 118.9                 |                                |                       |

**Figure S1:** ORTEP drawing of compound **1**,  $(\text{Hpyz}^+)_2[\text{UO}_2\text{Cl}_3(\text{H}_2\text{O})(\text{Pyz})_{0.5}]_2 \cdot 2\text{H}_2\text{O}$ .

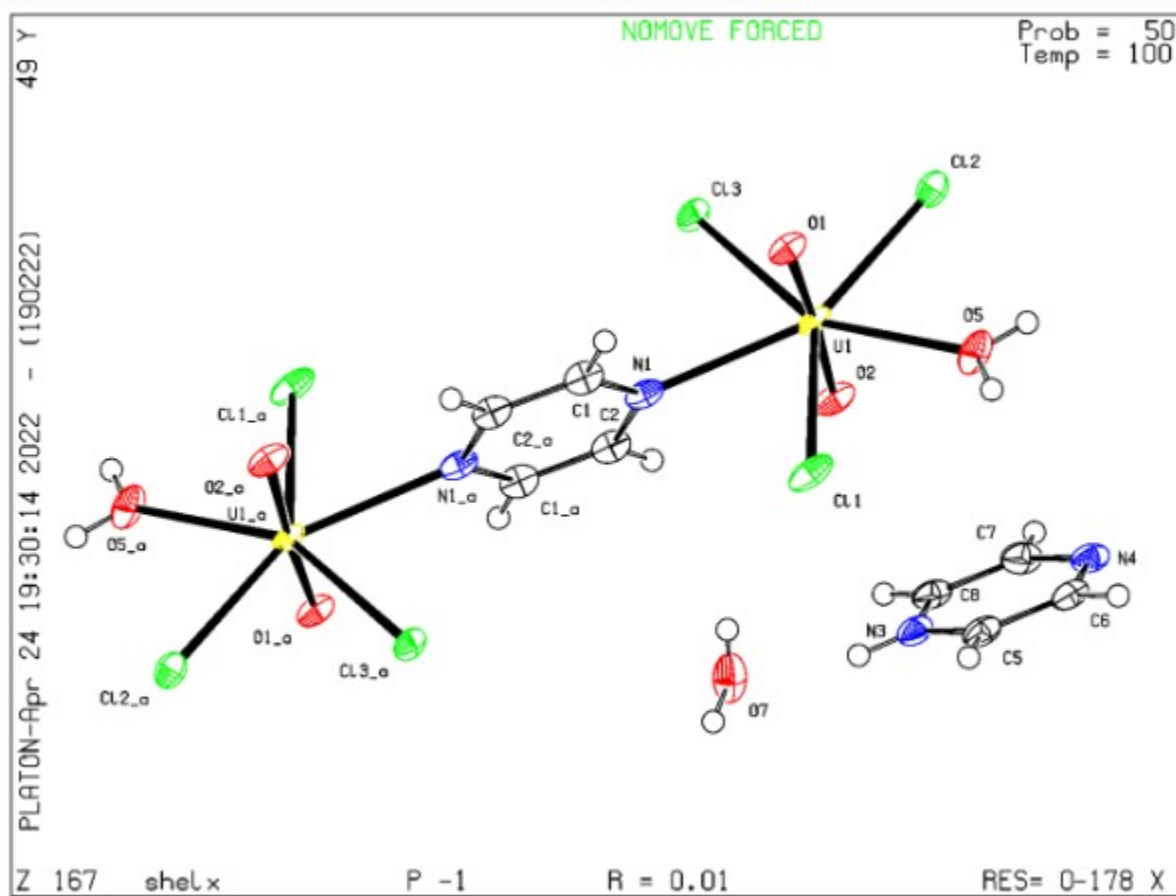

**Figure S2:** Room temperature UV-Visible-DRS spectrum of compound 1,  $(\text{HPyz}^+)_2[\text{UO}_2\text{Cl}_3(\text{H}_2\text{O})(\text{Pyz})_{0.5}]_2 \cdot 2\text{H}_2\text{O}$ .

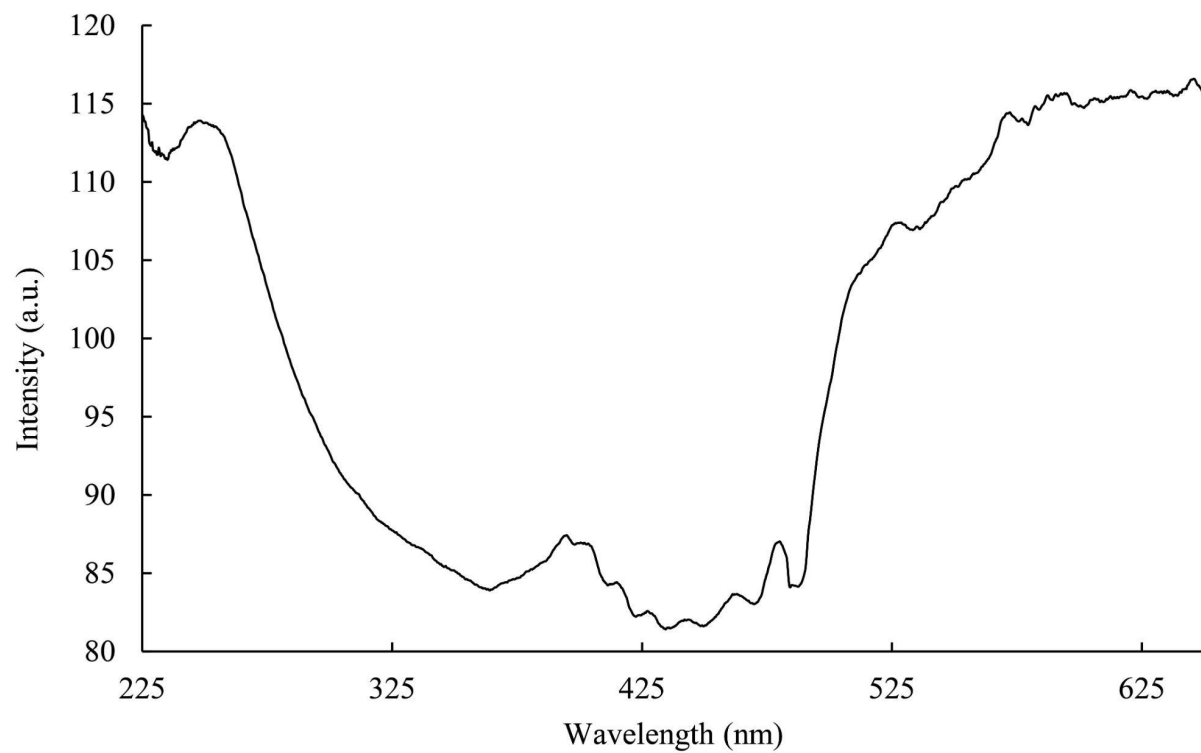

**Figure S3:** Room temperature Raman spectrum of compound 1,  $(\text{HPyz}^+)_2[\text{UO}_2\text{Cl}_3(\text{H}_2\text{O})(\text{Pyz})_{0.5}]_2 \cdot 2\text{H}_2\text{O}$ , using a 532 nm excitation line.

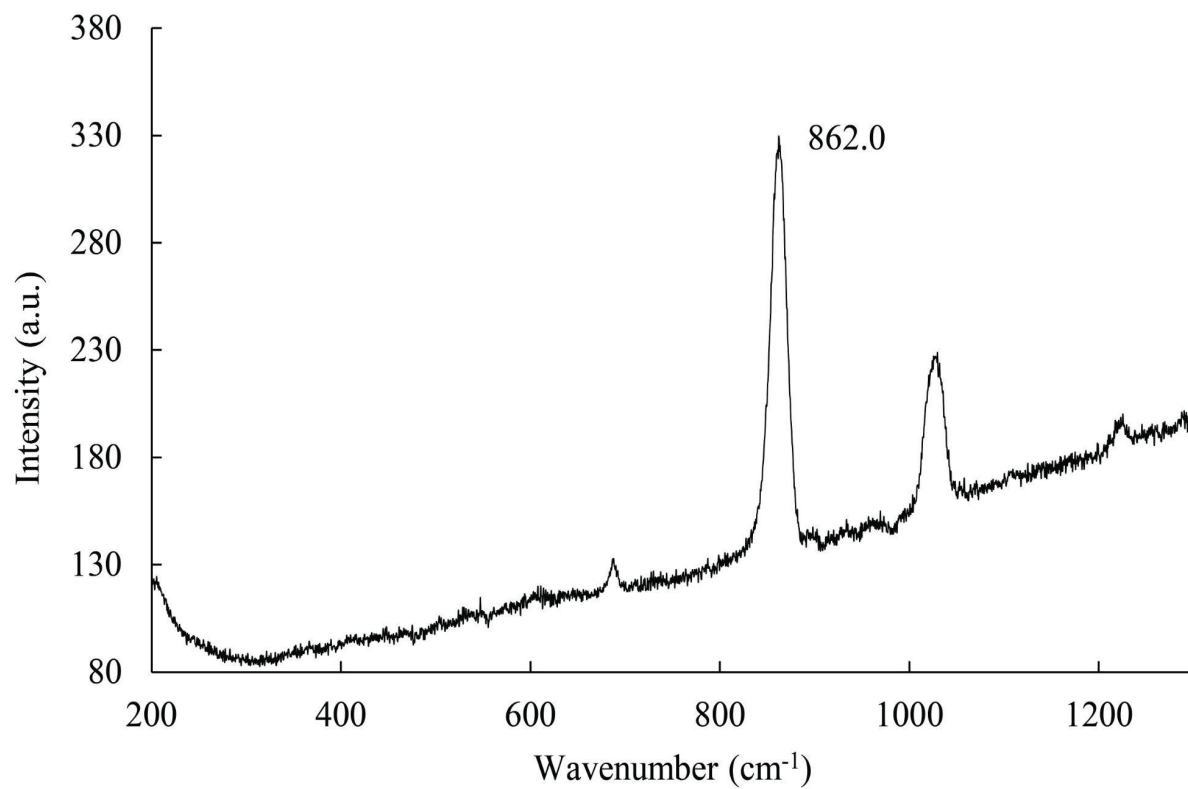

**Figure S4:** Model of the isolated  $[\text{UO}_2\text{Cl}_3(\text{H}_2\text{O})(\text{Pyz})_{0.5}]_2^{2-}$  anion, with relevant atoms labeled, which was utilized for all DFT and QTAIM calculations.

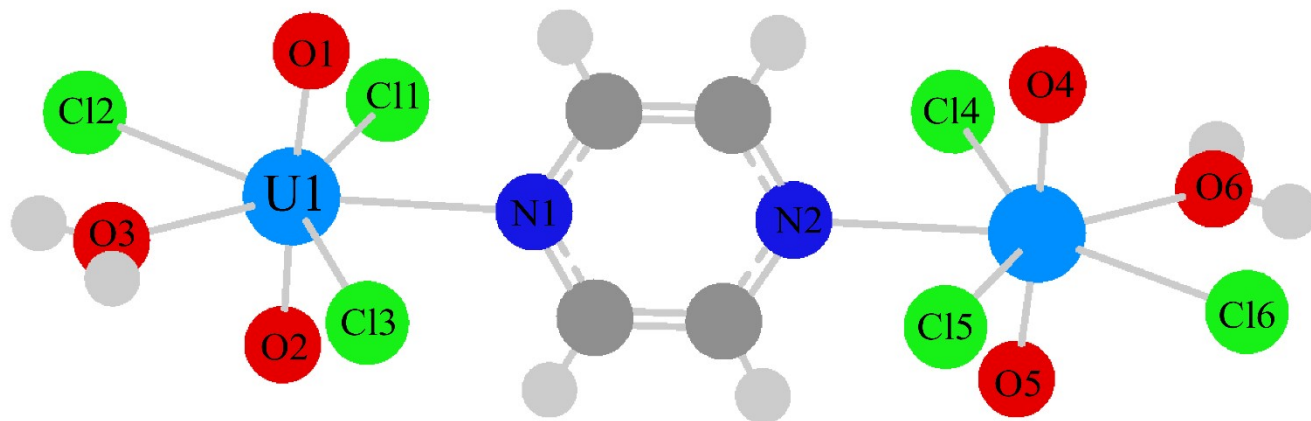



**Figure S5:** Side-by-side comparison of the unoptimized and optimized  $[\text{UO}_2\text{Cl}_3(\text{H}_2\text{O})(\text{Pyz})_{0.5}]_2^{2-}$  dimer from the top, in order to show the rotation of the equatorial bridging pyrazine and water molecules.

Unoptimized Geometry

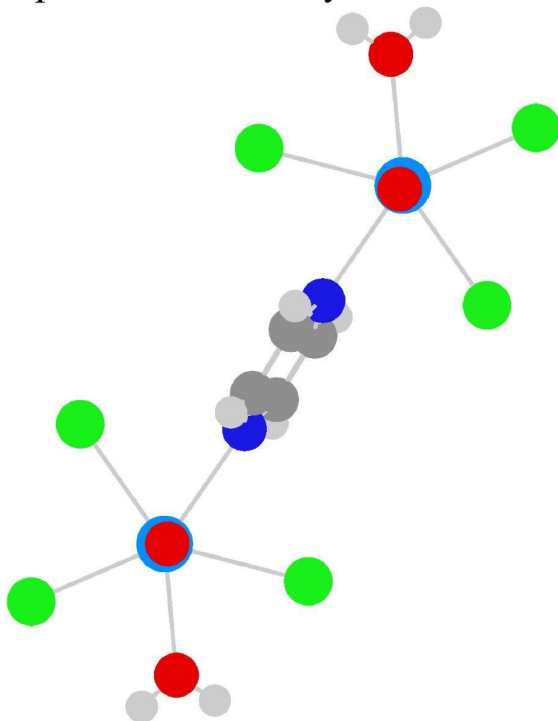

Optimized Geometry

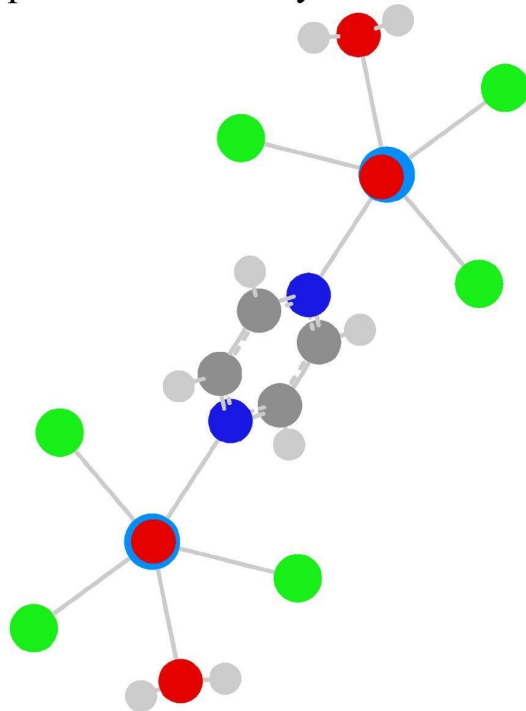

**Figure S6:** Model of the isolated  $[\text{UO}_2\text{Cl}_4]^{2-}$  dianion, with relevant atoms labeled, which was used for all DFT and QTAIM calculations.

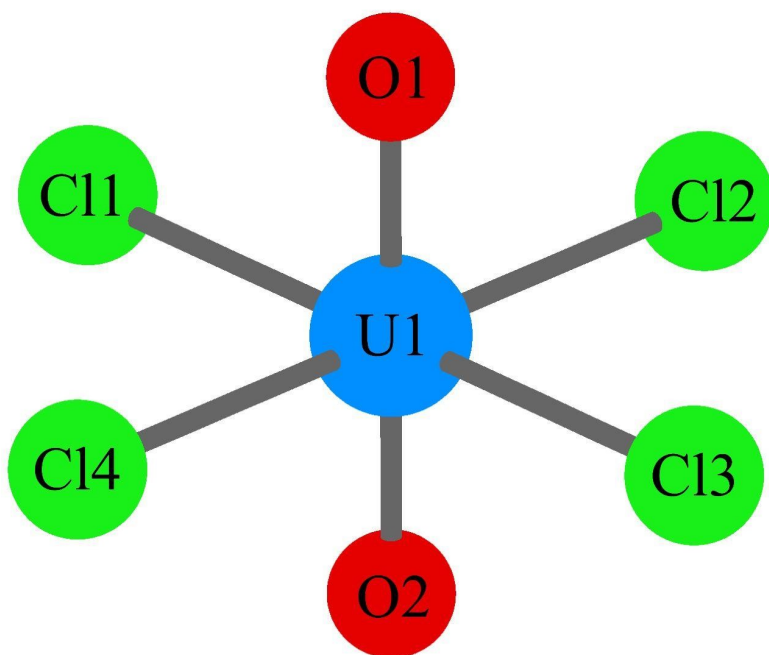

**Figure S6:** Isodensity representation of the (Left) equatorial chloride p orbitals that comprise the HOMO of the  $[\text{UO}_2\text{Cl}_4]^{2-}$  dianion and (Right) pure 5f orbitals, which serve as the LUMO of  $[\text{UO}_2\text{Cl}_4]^{2-}$ .

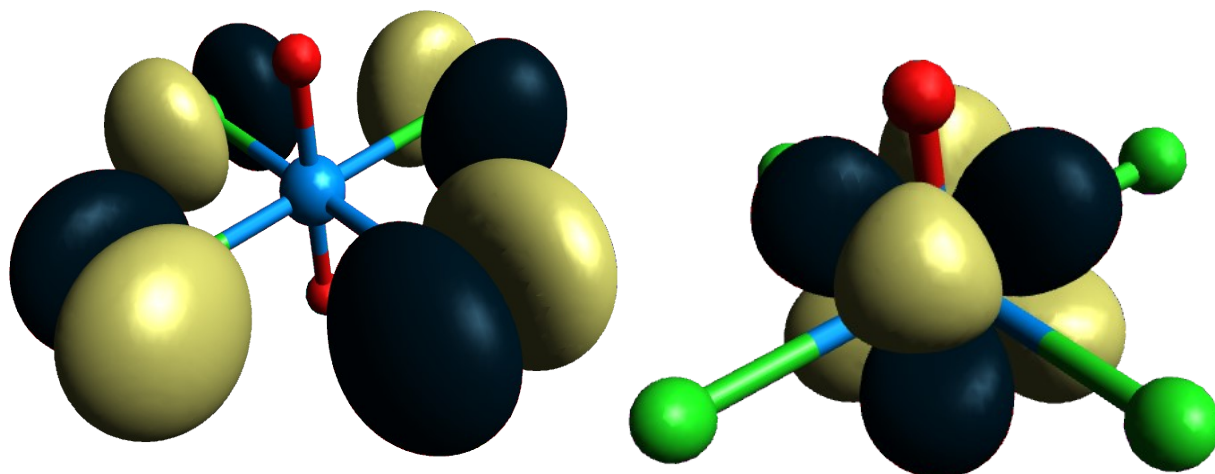

**Table S3:** Calculated Raman and IR frequencies and atomic displacements for the symmetric and asymmetric stretches of the  $[\text{UO}_2\text{Cl}_3(\text{H}_2\text{O})(\text{Pyz})_{0.5}]_2^{2-}$  dianion.

|             | 51      |       |       | 52       |       |       | 53       |       |       | 54      |       |       |
|-------------|---------|-------|-------|----------|-------|-------|----------|-------|-------|---------|-------|-------|
|             | AU      |       |       | AG       |       |       | AG       |       |       | AG      |       |       |
| Frequencies | 870.311 |       |       | 870.3182 |       |       | 918.0632 |       |       | 948.031 |       |       |
| Red. masses | 15.8616 |       |       | 14.5217  |       |       | 1.2732   |       |       | 16.3255 |       |       |
| Frc consts  | 7.0786  |       |       | 6.4807   |       |       | 0.6323   |       |       | 8.6449  |       |       |
| IR Inten    | 4.6401  |       |       | 0        |       |       | 0        |       |       | 0       |       |       |
| Raman Activ | 0       |       |       | 146.4454 |       |       | 4.4593   |       |       | 0.569   |       |       |
| Depolar (P) | 0       |       |       | 0.0052   |       |       | 0.1817   |       |       | 0.5318  |       |       |
| Depolar (U) | 0       |       |       | 0.0103   |       |       | 0.3076   |       |       | 0.6943  |       |       |
| Atom /AN    | X       | Y     | Z     | X        | Y     | Z     | X        | Y     | Z     | X       | Y     | Z     |
| 1 92        | 0.00    | 0.00  | 0.00  | 0.00     | 0.00  | 0.00  | 0.00     | 0.00  | 0.00  | -0.04   | -0.05 | 0.03  |
| 2 17        | 0.01    | -0.01 | 0.00  | 0.01     | -0.01 | 0.00  | 0.00     | 0.00  | 0.00  | 0.00    | 0.00  | 0.00  |
| 3 17        | -0.01   | 0.00  | -0.01 | -0.01    | 0.00  | -0.01 | 0.00     | 0.00  | 0.00  | 0.00    | 0.00  | 0.00  |
| 4 17        | 0.00    | 0.01  | 0.01  | 0.00     | 0.01  | 0.01  | 0.00     | 0.00  | 0.00  | 0.00    | 0.00  | 0.00  |
| 5 8         | 0.30    | 0.35  | -0.21 | 0.29     | 0.33  | -0.20 | 0.01     | 0.01  | -0.01 | 0.27    | 0.31  | -0.19 |
| 6 8         | -0.27   | -0.35 | 0.21  | -0.25    | -0.33 | 0.20  | -0.01    | -0.01 | 0.00  | 0.26    | 0.35  | -0.21 |
| 7 8         | 0.00    | -0.01 | -0.01 | -0.01    | -0.01 | -0.01 | 0.00     | 0.00  | 0.00  | 0.00    | 0.00  | 0.00  |
| 8 1         | 0.02    | 0.02  | 0.03  | 0.02     | 0.02  | 0.02  | 0.00     | 0.00  | 0.00  | -0.01   | -0.03 | -0.06 |
| 9 1         | 0.00    | 0.02  | -0.01 | 0.00     | 0.02  | 0.00  | 0.00     | 0.00  | 0.00  | -0.02   | -0.02 | -0.06 |
| 10 7        | 0.00    | 0.00  | 0.00  | 0.00     | 0.00  | 0.00  | 0.00     | 0.00  | 0.00  | 0.00    | 0.01  | 0.01  |
| 11 6        | 0.01    | -0.01 | 0.00  | 0.01     | -0.02 | -0.02 | 0.00     | 0.07  | 0.02  | 0.01    | -0.04 | 0.00  |
| 12 1        | 0.01    | 0.05  | 0.01  | -0.01    | 0.15  | 0.02  | 0.00     | -0.48 | -0.13 | -0.02   | 0.16  | 0.05  |
| 13 6        | 0.00    | 0.01  | 0.01  | -0.02    | 0.02  | 0.01  | 0.00     | -0.07 | -0.02 | -0.01   | -0.03 | -0.02 |
| 14 1        | 0.00    | -0.03 | 0.00  | -0.02    | -0.15 | -0.05 | -0.01    | 0.48  | 0.12  | -0.01   | 0.10  | 0.05  |
| 15 7        | 0.00    | 0.00  | 0.00  | 0.00     | 0.00  | 0.00  | 0.00     | 0.00  | 0.00  | 0.00    | -0.01 | -0.01 |
| 16 6        | 0.01    | -0.01 | 0.00  | -0.01    | 0.02  | 0.02  | 0.00     | -0.07 | -0.02 | -0.01   | 0.04  | 0.00  |
| 17 1        | 0.01    | 0.05  | 0.01  | 0.01     | -0.15 | -0.02 | 0.00     | 0.48  | 0.13  | 0.02    | -0.16 | -0.05 |
| 18 6        | 0.00    | 0.01  | 0.01  | 0.02     | -0.02 | -0.01 | 0.00     | 0.07  | 0.02  | 0.01    | 0.03  | 0.02  |
| 19 1        | 0.00    | -0.03 | 0.00  | 0.02     | 0.15  | 0.05  | 0.01     | -0.48 | -0.12 | 0.01    | -0.10 | -0.05 |
| 20 92       | 0.00    | 0.00  | 0.00  | 0.00     | 0.00  | 0.00  | 0.00     | 0.00  | 0.00  | 0.04    | 0.05  | -0.03 |
| 21 17       | 0.01    | -0.01 | 0.00  | -0.01    | 0.01  | 0.00  | 0.00     | 0.00  | 0.00  | 0.00    | 0.00  | 0.00  |
| 22 17       | -0.01   | 0.00  | -0.01 | 0.01     | 0.00  | 0.01  | 0.00     | 0.00  | 0.00  | 0.00    | 0.00  | 0.00  |
| 23 17       | 0.00    | 0.01  | 0.01  | 0.00     | -0.01 | -0.01 | 0.00     | 0.00  | 0.00  | 0.00    | 0.00  | 0.00  |
| 24 8        | 0.30    | 0.35  | -0.21 | -0.29    | -0.33 | 0.20  | -0.01    | -0.01 | 0.01  | -0.27   | -0.31 | 0.19  |
| 25 8        | -0.27   | -0.35 | 0.21  | 0.25     | 0.33  | -0.20 | 0.01     | 0.01  | 0.00  | -0.26   | -0.35 | 0.21  |
| 26 8        | 0.00    | -0.01 | -0.01 | 0.01     | 0.01  | 0.01  | 0.00     | 0.00  | 0.00  | 0.00    | 0.00  | 0.00  |
| 27 1        | 0.02    | 0.02  | 0.03  | -0.02    | -0.02 | -0.02 | 0.00     | 0.00  | 0.00  | 0.01    | 0.03  | 0.06  |
| 28 1        | 0.00    | 0.02  | -0.01 | 0.00     | -0.02 | 0.00  | 0.00     | 0.00  | 0.00  | 0.02    | 0.02  | 0.06  |

**Figure S7:** Calculated Raman spectra rendered from B3LYP outputs. An inset is provided to highlight the U=O  $\nu_1$  region from 790 to 900  $\text{cm}^{-1}$ .

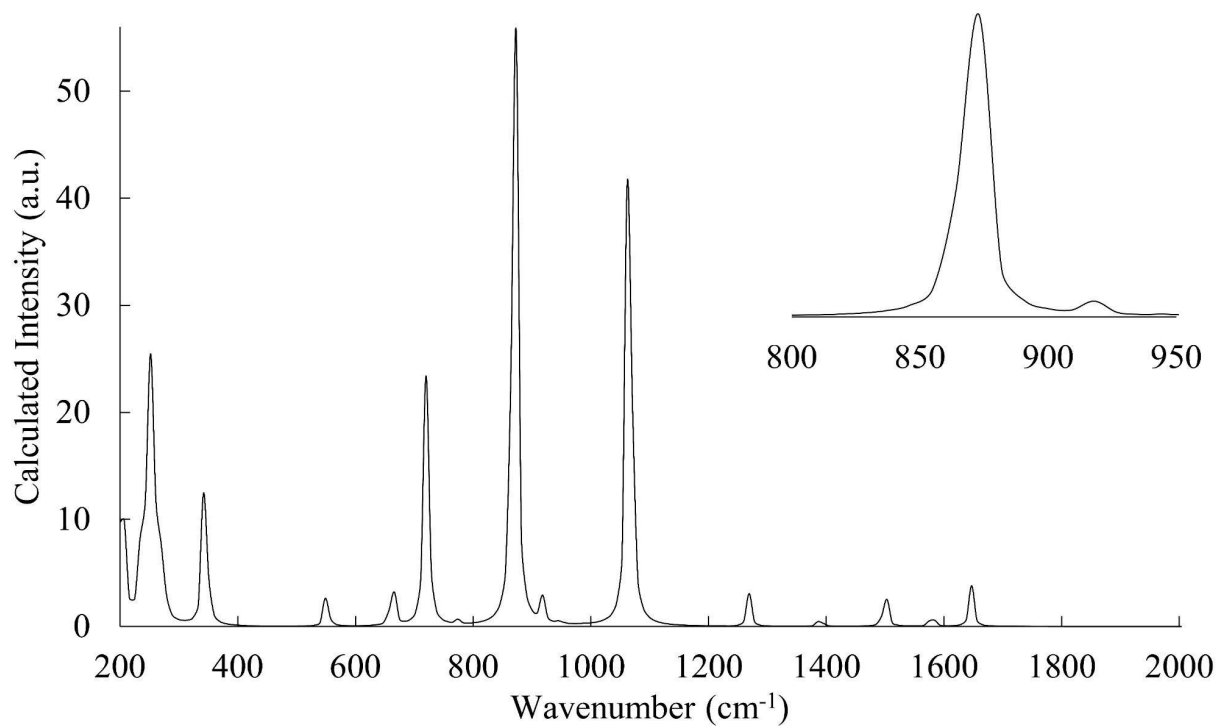

**Table S4:** Calculated Raman and IR frequencies and atomic displacements for  $[\text{UO}_2\text{Cl}_4]^{2-}$  in the uranyl symmetric stretch region ( $\nu = 750\text{-}900 \text{ cm}^{-1}$ ).

|             | <b>14</b> |       |       | <b>15</b> |       |       |
|-------------|-----------|-------|-------|-----------|-------|-------|
|             | AG        |       |       | AU        |       |       |
| Frequencies | 862.6125  |       |       | 942.2844  |       |       |
| Red. masses | 16.0154   |       |       | 18.1577   |       |       |
| Frc consts  | 7.0213    |       |       | 9.4989    |       |       |
| IR Inten    | 0.0000    |       |       | 336.0006  |       |       |
| Raman Activ | 73.0829   |       |       | 0.0000    |       |       |
| Depolar (P) | 0.0005    |       |       | 0.0000    |       |       |
| Depolar (U) | 0.0011    |       |       | 0.0000    |       |       |
| Atom/ AN    | X         | Y     | Z     | X         | Y     | Z     |
| 1 92        | 0.00      | 0.00  | 0.00  | 0.02      | 0.04  | -0.09 |
| 2 17        | 0.01      | -0.01 | 0.00  | 0.00      | 0.00  | 0.01  |
| 3 17        | -0.01     | -0.01 | -0.01 | 0.00      | 0.00  | 0.01  |
| 4 8         | -0.18     | -0.25 | 0.64  | -0.17     | -0.25 | 0.63  |
| 5 17        | -0.01     | 0.01  | 0.00  | 0.00      | 0.00  | 0.01  |
| 6 17        | 0.01      | 0.01  | 0.01  | 0.00      | 0.00  | 0.01  |
| 7 8         | 0.18      | 0.25  | -0.64 | -0.17     | -0.25 | 0.63  |

**Table S5:** Method validation across B3LYP, BLYP, CAM-B3LYP, BP86, PBE1PBE and TPSSH functionals for the  $[\text{UO}_2\text{Cl}_3(\text{H}_2\text{O})(\text{Pyz})_{0.5}]_2^{2-}$  computational model, using Wiberg bond indices as a reference metric. Although slight deviations in index values occur across functionals, we observe the same trends in bonding, supporting the validity of the model and the lack of potential functional bias, further supported by low standard deviations.

|                   | B3LYP  | BLYP   | CAM-B3LYP | BP86   | PBE1PBE | TPSSH  | Std. Dev. (%) |
|-------------------|--------|--------|-----------|--------|---------|--------|---------------|
| U=O1              | 2.0695 | 2.0923 | 2.0653    | 2.1065 | 2.0774  | 2.0820 | -             |
| U=O2              | 2.0645 | 2.0873 | 2.0602    | 2.1015 | 2.0724  | 2.0869 | -             |
| U=O Average       | 2.0670 | 2.0898 | 2.0628    | 2.1040 | 2.0749  | 2.0845 | 1.54          |
| U-Cl1             | 0.7663 | 0.8201 | 0.7359    | 0.8265 | 0.7603  | 0.7874 | -             |
| U-Cl2             | 0.8575 | 0.9195 | 0.8225    | 0.9256 | 0.8490  | 0.8807 | -             |
| U-Cl3             | 0.8749 | 0.9484 | 0.8329    | 0.9544 | 0.8643  | 0.9024 | -             |
| Average U-Cl      | 0.8329 | 0.8960 | 0.7971    | 0.9022 | 0.8245  | 0.8568 | 4.15          |
| U-N1              | 0.3247 | 0.3427 | 0.3152    | 0.3467 | 0.3230  | 0.3329 | 1.22          |
| U-OH <sub>2</sub> | 0.3157 | 0.3271 | 0.3136    | 0.3330 | 0.3164  | 0.3231 | 0.76          |

**Table S5:** Method validation across B3LYP, BLYP, CAM-B3LYP, BP86, PBE1PB3 and TPSSH functionals for the  $[\text{UO}_2\text{Cl}_4]^{2-}$  computational model, using Wiberg bond indices as a reference metric. Although slight deviations in index values occur across functionals, we observe the same trends in bonding, supporting the validity of the model and the lack of potential functional bias, further supported by low standard deviations.

|              | B3LYP  | BLYP   | CAM-B3LYP | BP86   | PBE1PBE | TPSSH  | Std. Dev. (%) |
|--------------|--------|--------|-----------|--------|---------|--------|---------------|
| U=O1         | 2.0540 | 2.0771 | 2.0495    | 2.0911 | 2.0621  | 2.0719 | -             |
| U=O2         | 2.0540 | 2.0771 | 2.0495    | 2.0910 | 2.0621  | 2.0719 | -             |
| U=O Average  | 2.0540 | 2.0771 | 2.0495    | 2.0911 | 2.0621  | 2.0719 | 1.55          |
| U-Cl1        | 0.8235 | 0.8755 | 0.7925    | 0.8815 | 0.816   | 0.8418 | -             |
| U-Cl2        | 0.8424 | 0.8945 | 0.8101    | 0.9007 | 0.8349  | 0.8609 | -             |
| U-Cl3        | 0.8237 | 0.8757 | 0.7923    | 0.8817 | 0.8162  | 0.8420 | -             |
| U-Cl4        | 0.8415 | 0.8936 | 0.8110    | 0.8998 | 0.8340  | 0.8600 | -             |
| U-Cl Average | 0.8328 | 0.8848 | 0.8015    | 0.8909 | 0.8253  | 0.8512 | 3.50          |



## References

1. Groom CR, Bruno IJ, Lightfoot MP, Ward SC. The Cambridge Structural Database. *Acta Cryst B*. 2016 Apr 1;72(2):171–9. CSD version: 5.43, update 1: [cited 2022 June 16].
2. Thuéry P, Masci B. Uranyl Ion Complexation by Cucurbiturils in the Presence of Perrhenic, Phosphoric, or Polycarboxylic Acids. Novel Mixed-Ligand Uranyl–Organic Frameworks. *Crystal Growth & Design*. 2010 Feb 3;10(2):716–25.
3. Haegele R, Boeyens JCA. Crystal structure of benzyltrimethylammonium  $\mu_2$ -peroxo-bis[trichlorodioxouranate(VI)], a binuclear uranium complex containing dioxygen in a  $\mu_2$ -peroxo-linkage. *J Chem Soc, Dalton Trans*. 1977 Jan 1;(7):648–50.
4. Walker SM, Halasyamani PS, Allen S, O’Hare D. From Molecules to Frameworks: Variable Dimensionality in the  $\text{UO}_2(\text{CH}_3\text{COO})_2 \cdot 2\text{H}_2\text{O}/\text{HF}(\text{aq})/\text{Piperazine}$  System. Syntheses, Structures, and Characterization of Zero-Dimensional  $(\text{C}_4\text{N}_2\text{H}_{12})\text{UO}_2\text{F}_4 \cdot 3\text{H}_2\text{O}$ , One-Dimensional  $(\text{C}_4\text{N}_2\text{H}_{12})_2\text{U}_2\text{F}_{12} \cdot \text{H}_2\text{O}$ , Two-Dimensional  $(\text{C}_4\text{N}_2\text{H}_{12})_2(\text{U}_2\text{O}_4\text{F}_5)_4 \cdot 11\text{H}_2\text{O}$ , and Three-Dimensional  $(\text{C}_4\text{N}_2\text{H}_{12})\text{U}_2\text{O}_4\text{F}_6$ . *J Am Chem Soc*. 1999 Nov 1;121(45):10513–21.
5. Mehdoui T, Berthet JC, Thuéry P, Ephritikhine M. Clear-Cut Lanthanide(III)/Actinide(III) Differentiation in Coordination of Pyrazine to Tris(cyclopentadienyl) Complexes of Cerium and Uranium, Involving Reversible  $\text{U}^{\text{III}} \rightarrow \text{U}^{\text{IV}}$  Oxidation. *European Journal of Inorganic Chemistry*. 2004;2004(10):1996–2000.
6. Severance, R. C., Smith, M. D., zur Loye, H. C. *CSD Communication*, 2016. CCDC: 827123.
7. Evans WJ, Takase MK, Ziller JW, DiPasquale AG, Rheingold AL. Reductive Reactivity of the Tetravalent Uranium Complex  $[(\eta^5\text{-C}_5\text{Me}_5)(\eta^8\text{-C}_8\text{H}_8)\text{U}]_2(\mu\text{-}\eta^3\text{:}\eta^3\text{-C}_8\text{H}_8)$ . *Organometallics*. 2009 Jan 12;28(1):236–43.

8. Monreal MJ, Khan SI, Kiplinger JL, Diaconescu PL. Molecular quadrangle formation from a diuranium  $\mu$ - $\eta^6$ , $\eta^6$ -toluene complex. *Chem Commun.* 2011 Aug 2;47(32):9119–21.
9. Frisch M, Cahill CL. Thorium(IV) Coordination Polymers in the Pyridine and Pyrazinedicarboxylic Acid Systems. *Crystal Growth & Design.* 2008 Aug 1;8(8):2921–8.
10. Masci B, Thuéry P. Pyrazinetetracarboxylic Acid as an Assembler Ligand in Uranyl–Organic Frameworks. *Crystal Growth & Design.* 2008 May 1;8(5):1689–96.
11. Hu KQ, Zeng LW, Kong XH, Huang ZW, Yu JP, Mei L, et al. Viologen-Based Uranyl Coordination Polymers: Anion-Induced Structural Diversity and the Potential as a Fluorescent Probe. *European Journal of Inorganic Chemistry.* 2021;2021(48):5077–84.
12. Ivanov, S. B., Davidovich, R. L., Mikhailov, Yu. N., Shchelokov, R. N. *Koord. Khim.(Russ.)(Coord. Chem.)*, 1982, 8, 211.
13. Wang CM, Liao CH, Kao HM, Lii KH. Hydrothermal Synthesis and Characterization of  $[(UO_2)_2F_8(H_2O)_2Zn_2(4,4'\text{-bpy})_2] \cdot (4,4'\text{-bpy})$ , a Mixed-Metal Uranyl Aquofluoride with a Pillared Layer Structure. *Inorg Chem.* 2005 Sep 1;44(18):6294–8.
14. Bombieri G, De Paoli G, Immirzi A. An example of uranium(IV) insertion within a macrocyclic crown ether with coexistence of the metal in two oxidation states. *Journal of Inorganic and Nuclear Chemistry.* 1978 Jan 1;40(11):1889–94.
15. Mak TCW, Wai-Hing Y. Synthesis and crystal structure of bis(tetramethylammonium) aquotetra-fluorodioxouranate(VI) dihydrate,  $[(Cl_3)_4 N]_2[UO_2 F_4(H_2 O)] \cdot 2H_2O$ . *Inorganica Chimica Acta.* 1985 Mar 1;109(2):131–3.
16. Zhang Y, Lu K, Liu M, Karatchevtseva I, Tao Z, Wei G. Thorium(IV) and uranium(VI) compounds of cucurbit[10]uril: from a one-dimensional nanotube to a supramolecular framework. *Dalton Trans.* 2020 Jan 2;49(2):404–10.

17. Hassaballa H, Steed JW, Junk PC. New insights into the formation of extended supramolecular architectures from simple building blocks. *Chem Commun.* 1998 Jan 1;(5):577–8.
18. Hassaballa H, Steed JW, Junk PC, Elsegood MRJ. Formation of Lanthanide and Actinide Oxonium Ion Complexes with Crown Ethers from a Liquid Clathrate Medium. *Inorg Chem.* 1998 Sep 1;37(18):4666–71.
19. Kerr, AT, Kumalah, SA, Holman, KT, Butcher, RJ, Cahill, CL. Uranyl Coordination Polymers Incorporating  $\eta^5$ -Cyclopentadienyliron-Functionalized  $\eta^6$ -Phthalate Metalloligands: Syntheses, Structures and Photophysical Properties. *J. Inorg. Organomet. Polym. Mater.*, 2014(24):128.
20. Mikhailov, Yu. N., Ivanov, S. B., Kuznetsov, V. G., Davidovich, R. L., *Koord. Khim.* (Russ.)(*Coord. Chem.*), 1979;(5):1545.
21. Ok KM, O'Hare D. Hydrothermal synthesis, crystal structure, and characterization of a new pseudo-two-dimensional uranyl oxyfluoride,  $[N(C_2H_5)_4]_2[(UO_2)_4(OH)_2]_3F_{10}$ . *Journal of Solid State Chemistry.* 2007 Feb 1;180(2):446–52.
22. Yue Z, Lin J, Silver MA, Han L, Li X, Zhou J, et al. Anionic uranyl oxyfluorides as a bifunctional platform for highly selective ion-exchange and photocatalytic degradation of organic dyes. *Dalton Trans.* 2018 Oct 30;47(42):14908–16.
23. Liu XX, Wang Y, Tian WG, Yang W, Sun ZM. Heterometallic zinc uranium oxyfluorides incorporating imidazole ligands. *Chinese Chemical Letters.* 2015 Jun 1;26(6):641–5.
